# Supplementary material for: Expanded circulating hematopoietic stem/ progenitor cells as novel cell source for the treatment of TCIRG1 osteopetrosis
Source: PubMed Central journal article supplement — Haematologica. 2020 Jan 16;106(1):74–86. doi: 10.3324/haematol.2019.238261 (PMC7776247; doi:10.3324/haematol.2019.238261), 2020-01-16
Supplement: 2019_238261-Disclosures_Contributions.pdf [file 2019_238261-Disclosures_Contributions.pdf]

Haematologica  
HAEMATOL/2019/238261  
Version 4

Expanded circulating hematopoietic stem/progenitor cells as novel cell source for the treatment of TCIRG1 osteopetrosis

Valentina Capo, Sara Penna, Ivan Merelli, Matteo Barcella, Serena Scala, Luca Basso-Ricci, Elena Draghici, Eleonora Palagano, Erika Zonari, Giacomo Desantis, Paolo Uva, Roberto Cusano, Lucia Sergi Sergi, Laura Crisafulli, Despina Moshous, Polina Stepensky, Katarzyna Drabko, Zühre Kaya, Ekrem Unal, Alper Gezdirici, Giuseppe Menna, Marta Serafini, Alessandro Aiuti, Silvia Laura Locatelli, Carmelo Carlo-Stella, Ansgar S. Schulz, Francesca Ficara, Cristina Sobacchi, Bernhard Gentner, and Anna Villa

Disclosures: All authors declare no conflict of interest. This research was supported by a grant from the Telethon Foundation (TGT16C05) to A.V. and partially by a fellowship from the European Calcified Tissue Society (ECTS) to V.C..

Contributions: V.C., S.P., S.S, L.B.R., E.D., L.S.S and L.C. performed experiments and analyzed the data. E.P., E.Z., G.D. and M.S. provided intellectual input, reagents, and protocols. I.M., M.B., P.U. and R.C. performed and analyzed RNAseq experiments. D.M., P.S., K.D., Z.K., E.U., A.G., G.M., A.A., S.L.L., C.C.S. and A.S. provided patient samples and data. V.C., S.P., F.F., C.S. and A.V. contributed to write the manuscript. B.G. and A.V. designed and coordinated the research. All authors critically revised the manuscript.
